# Supplementary figures and images for: Krill Oil Inhibits Cholesterol Synthesis and Stimulated Cholesterol Excretion in Hypercholesterolemic Rats
Source: MDPI journal article supplement (doi:10.3390/md20100609), 2022-09-27

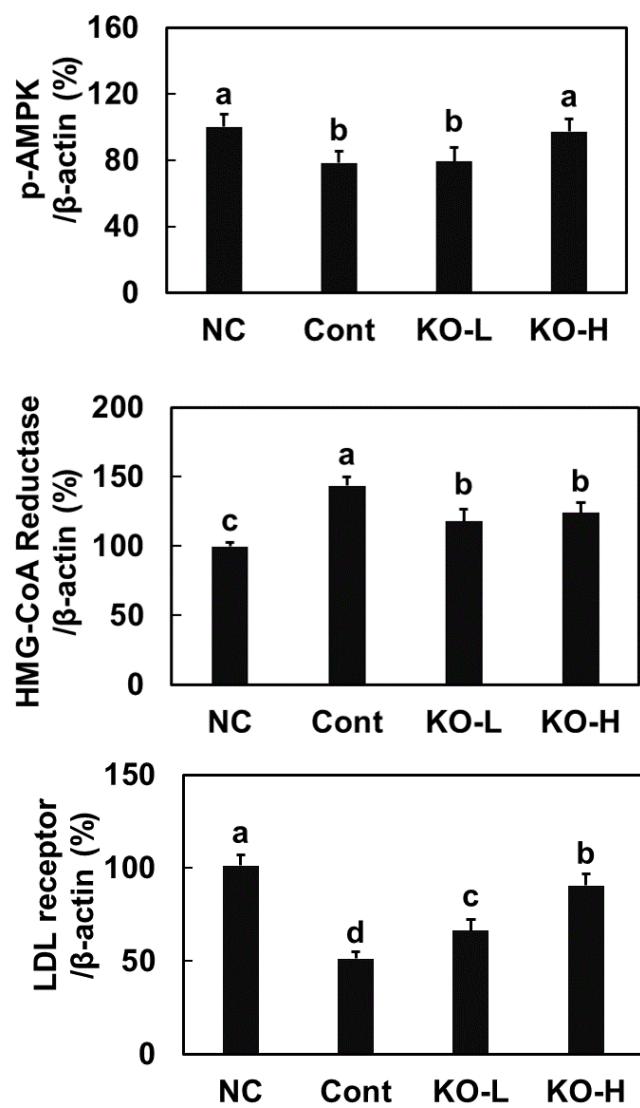

Figure S1. Quantification of the western blot bands relative expression in Figure 2D.

Supplement: s1 [file s1]
